# Supplementary material for: Woman with right abdominal pain
Source: PubMed Central journal article supplement — J Am Coll Emerg Physicians Open. 2023 Jan 15;4(1):e12890. doi: 10.1002/emp2.12890 (PMC9841123; doi:10.1002/emp2.12890), 2023-01-15
Supplement: EMP2-4-e12890-s001.pdf [file EMP2-4-e12890-s001.pdf]

Supplemental File 1

Full CT image series to scroll through

### **Woman With Right Abdominal Pain**

Below we have included a link to the patient's de-identified abdomen/pelvis computed tomography (CT) scan obtained in the ED:

[https://www.pacsbin.com/c/WkXdCaS\\_d](https://www.pacsbin.com/c/WkXdCaS_d)

This is the full abdomen/pelvis CT image series that you can scroll through yourself. The CT is hosted on pacsbin.com, a web-based radiology platform that simulates a typical radiology picture archiving and communication system and allows users to scroll through a CT scan just like they would in an authentic clinical environment. This platform provides a more interactive way to experience the case than by simply viewing single, static images.

You can click the turquoise clipboard icon on the top right of the viewer for more information about the scan.
